# Supplementary material for: Assessing outcomes of large-scale public health interventions in the absence of baseline data using a mixture of Cox and binomial regressions
Source: PubMed Central journal article supplement (PMC4029466; doi:10.1186/1471-2288-14-2), 2014-01-07
Supplement: 1471-2288-14-2-S1.pdf [file 1471-2288-14-2-S1.pdf]

**Results obtained when fitting the Cox model to all individuals, with FSWs starting CCU at beginning of career given a time of CCU of 1 day = 1/365 year**

| <b>District</b> | <b><math>n_{\text{Cox}}</math></b> | <b><math>\hat{h}_1</math></b> | <b><math>\hat{h}_2</math></b> | <b><math>p_{\text{Cox}}</math></b> |
|-----------------|------------------------------------|-------------------------------|-------------------------------|------------------------------------|
| Belgaum         | 397                                | 0.230                         | 0.431                         | <0.001                             |
| Bellary         | 398                                | 0.160                         | 0.411                         | <0.001                             |
| Chennai         | 349                                | 0.133                         | 0.503                         | <0.001                             |
| Chittoor        | 395                                | 0.022                         | 0.132                         | <0.001                             |
| Coimbatore      | 325                                | 0.015                         | 0.160                         | <0.001                             |
| Dharmapuri      | 387                                | 0.040                         | 0.331                         | <0.001                             |
| East Godavari   | 392                                | 0.125                         | 0.364                         | <0.001                             |
| Guntur          | 386                                | 0.040                         | 0.378                         | <0.001                             |
| Madurai         | 319                                | 0.084                         | 0.298                         | <0.001                             |
| Mumbai BB       | 379                                | 0.390                         | 0.232                         | 0.541                              |
| Mumbai NBB      | 354                                | 0.368                         | 0.212                         | 0.023                              |
| Mysore          | 420                                | 0.083                         | 0.242                         | <0.001                             |
| Prakasam        | 402                                | 0.013                         | 0.139                         | <0.001                             |
| Pune BB         | 399                                | 0.661                         | 0.642                         | <0.001                             |
| Pune NBB        | 251                                | 0.531                         | 0.505                         | <0.001                             |
| Salem           | 319                                | 0.080                         | 0.374                         | <0.001                             |
| Shimoga         | 338                                | 0.122                         | 0.372                         | <0.001                             |
| Thane BB        | 397                                | 0.813                         | 0.862                         | 0.145                              |
| Thane NBB       | 377                                | 0.675                         | 0.767                         | <0.001                             |
| Visakhapatnam   | 405                                | 0.058                         | 0.420                         | <0.001                             |
| Yevatmal        | 148                                | 0.271                         | 0.683                         | <0.001                             |
