# Supplementary material for: Assessing outcomes of large-scale public health interventions in the absence of baseline data using a mixture of Cox and binomial regressions
Source: PubMed Central journal article supplement (PMC4029466; doi:10.1186/1471-2288-14-2), 2014-01-07
Supplement: 1471-2288-14-2-S2.pdf [file 1471-2288-14-2-S2.pdf]

```
# This function performs Cox-logit analysis to test whether the
# rate of condom use at start of FSW career is the
# same pre- and post-intervention. Uses Sim data structure
#
# INPUTS:
# Donnees: A matrix with the data.
# column 1 -> birthday in years (for instance July 1, 1972 would be 1972.5
# and January 1, 1982 would be 1982.0)
# column 2 -> time from birth until first of end of career as FSW or end of follow-up
# column 3 -> date (in years) of beginning of career as FSW
# column 4 -> date (in years) of beginning of consistent condom use
# Interv: date (in years) of intervention, i.e., time t0
# Analyses: date (in years) of data collection, i.e., time tau
# Link: link function for the logistic regression
#
# OUTPUT:
# This function returns a vector with the following elements:
# "n.logit" -> number of FSW in the logistic regression part of the analysis
# "n.cox" -> number of FSW in the Cox regression part of the analysis
# "rate.pre" -> rate of acquisition of condom use before t0, i.e., h1
# "rate.post" -> rate of acquisition of condom use after t0, i.e., h2
# "prev.pre" -> prevalence of condom use at start of career before t0, i.e., pi1
# "prev.post" -> prevalence of condom use at start of career after t0, i.e., pi2
# "p.cox" -> p-value for the 2-sided test that coefficient in Cox model is 0
# "p.logit" -> p-value for the 2-sided test that coefficient in logit model is 0
```

# "p.2dl" -> p-value of the test on 2 degrees of freedom of the two hypotheses above combined

```
coxcutS <- function(Donnees,Interv=2004.0,Analyse=2009.0,Link="logit"){  
  
  debut.FSW <- Donnees[,3]  
  
  debut.condom <- Donnees[,4]  
  
  fin.FU <- Donnees[,1]+Donnees[,2]  
  
  # women who are FSW at time of data collection  
  
  M <- length(debut.FSW)  
  
  in.study <- (1:M)*((debut.FSW<Analyse)*(fin.FU>=Analyse))  
  
  Donnees <- Donnees[in.study,]  
  
  debut.FSW <- Donnees[,3]  
  
  debut.condom <- Donnees[,4]  
  
  
  # LOGIT analysis  
  
  # y=1 if condom at beginning of career, 0 otherwise  
  
  # x=1 if career started after t0, 0 otherwise  
  
  y <- 1*(debut.condom==debut.FSW)  
  
  x <- 1*(debut.FSW >= Interv)  
  
  users.pre <- sum(y[x==0])  
  
  users.post <- sum(y[x==1])  
  
  model.logit <- glm(y~x,family=binomial(link=Link))  
  
  p.val.logit <- 1-pchisq((model.logit$null.deviance-model.logit$deviance),1)  
  
  n.logit <- length(y)  
  
  n.pre <- length(y[x==0])  
  
  n.post <- length(y[x==1])  
  
  prev.pre <- users.pre/n.pre
```

```
prev.post <- users.post/n.post
```

```
# Cox analysis
```

```
# We only keep FSW with Y=0
```

```
in.cox <- (1:n.logit)[y==0]
```

```
Donnees <- Donnees[in.cox,]
```

```
debut.FSW <- Donnees[,3]
```

```
debut.condom <- Donnees[,4]
```

```
n.cox <- length(debut.FSW)
```

```
donnees.cox <- t(rep(0,4))
```

```
for(i in 1:n.cox){
```

```
  # case (a): career starts after t0, condom use starts after tau
```

```
  if((debut.FSW[i]>=Interv)&(debut.condom[i]>=Analyse)){
```

```
    t1 <- 0
```

```
    t2 <- Analyse-debut.FSW[i]
```

```
    d <- 0
```

```
    z <- 1
```

```
    donnees.cox <- rbind(donnees.cox,t(c(t1,t2,d,z)))
```

```
  }
```

```
  # case (b): career starts after t0, condom use starts before tau
```

```
  if((debut.FSW[i]>=Interv)&(debut.condom[i]<Analyse)){
```

```
    t1 <- 0
```

```
    t2 <- debut.condom[i]-debut.FSW[i]
```

```
    d <- 1
```

```
    z <- 1
```

```
    donnees.cox <- rbind(donnees.cox,t(c(t1,t2,d,z)))
```

```
}
```

```
# case (c): career starts before t0, condom use starts after tau
```

```
if((debut.FSW[i]<Interv)&(debut.condom[i]>=Analyse)){
```

```
  t1 <- 0
```

```
  t2 <- Interv-debut.FSW[i]
```

```
  d <- 0
```

```
  z <- 0
```

```
  donnees.cox <- rbind(donnees.cox,t(c(t1,t2,d,z)))
```

```
  t1 <- Interv-debut.FSW[i]
```

```
  t2 <- Analyse-debut.FSW[i]
```

```
  d <- 0
```

```
  z <- 1
```

```
  donnees.cox <- rbind(donnees.cox,t(c(t1,t2,d,z)))
```

```
}
```

```
# case (d): career starts before t0, condom use starts after t0 but before tau
```

```
if((debut.FSW[i]<Interv)&(debut.condom[i]<Analyse)&(debut.condom[i]>=Interv)){
```

```
  t1 <- 0
```

```
  t2 <- Interv-debut.FSW[i]
```

```
  d <- 0
```

```
  z <- 0
```

```
  donnees.cox <- rbind(donnees.cox,t(c(t1,t2,d,z)))
```

```
  t1 <- Interv-debut.FSW[i]
```

```
  t2 <- debut.condom[i]-debut.FSW[i]
```

```
  d <- 1
```

```
  z <- 1
```

```
  donnees.cox <- rbind(donnees.cox,t(c(t1,t2,d,z)))
```

```

}

# case (e): career and condom use both start before t0

if((debut.FSW[i]<Interv)&(debut.condom[i]<Interv)){

  t1 <- 0

  t2 <- debut.condom[i]-debut.FSW[i]

  d <- 1

  z <- 0

  donnees.cox <- rbind(donnees.cox,t(c(t1,t2,d,z)))

}

}

donnees.cox <- donnees.cox[-1,]

t1 <- donnees.cox[,1]

t2 <- donnees.cox[,2]

d <- donnees.cox[,3]

z <- donnees.cox[,4]

library(survival)

model.cox <- coxph(Surv(t1,t2,d)~z)

p.val.cox <- 1-pchisq(2*(model.cox$loglik[2]-model.cox$loglik[1]),1)

donnees.cox.pre <- donnees.cox[donnees.cox[,4]==0,]

donnees.cox.post <- donnees.cox[donnees.cox[,4]==1,]

personyears.pre <- sum(donnees.cox.pre[,2]-donnees.cox.pre[,1])

personyears.post <- sum(donnees.cox.post[,2]-donnees.cox.post[,1])

cases.pre <- sum(donnees.cox.pre[,3])

cases.post <- sum(donnees.cox.post[,3])

taux.pre <- cases.pre/personyears.pre

taux.post <- cases.post/personyears.post

```

```
# hypothesis test on 2 degrees of freedom

null.loglik <- model.cox$loglik[1]-model.logit$null.deviance/2

h1.loglik <- model.cox$loglik[2]-model.logit$deviance/2

lrt.stat <- 2*(h1.loglik-null.loglik)

p.val.2dl <- 1-pchisq(lrt.stat,2)

# preparation of the output

output <- c(n.logit,n.cox,taux.pre,taux.post,
           prev.pre,prev.post,p.val.cox,p.val.logit,p.val.2dl)

names(output) <- c("n.logit","n.cox","rate.pre","rate.post",
                 "prev.pre","prev.post","p.cox","p.logit","p.2df")

return(output)

}
```
